# Supplementary material for: Superior gas-sensing and lithium-storage performance SnO2 nanocrystals synthesized by hydrothermal method
Source: Royal Society of Chemistry journal article supplement (doi:10.1039/c1ce05320e), 2011-01-01
Supplement: c1ce05320e.pdf [file c1ce05320e.pdf]

# Superior gas-sensing and lithium-storage performances of SnO<sub>2</sub> nanocrystals synthesized by hydrothermal method

*Jianmin Ma, Jun Zhang, Shurong Wang, Qinghong Wang, Lifang Jiao, Jiaqin Yang, Xiaochuan Duan, Zhifang Liu, Jiabiao Lian and Wenjun Zheng\**

Department of Materials Chemistry,

Key Laboratory of Advanced Energy Materials Chemistry (MOE),

College of Chemistry, Nankai University, Tianjin, 300071, P. R. China

Corresponding Author: Prof. Wenjun Zheng

Address: Department of Materials Chemistry, College of Chemistry, Nankai University, Tianjin, P. R. China

Phone: +86-22-23507951

Fax: +86-22-23502604

E-mail: [zhwj@nankai.edu.cn](mailto:zhwj@nankai.edu.cn)

### Supporting Information

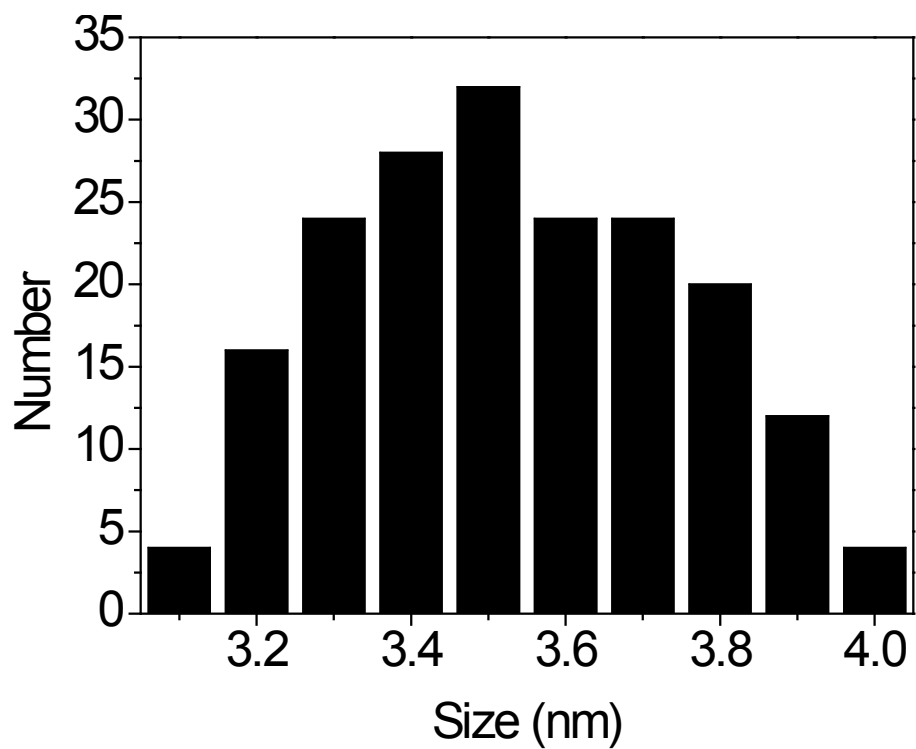

**Fig. S1** Size distribution of the as-synthesized SnO<sub>2</sub> nanocrystals.

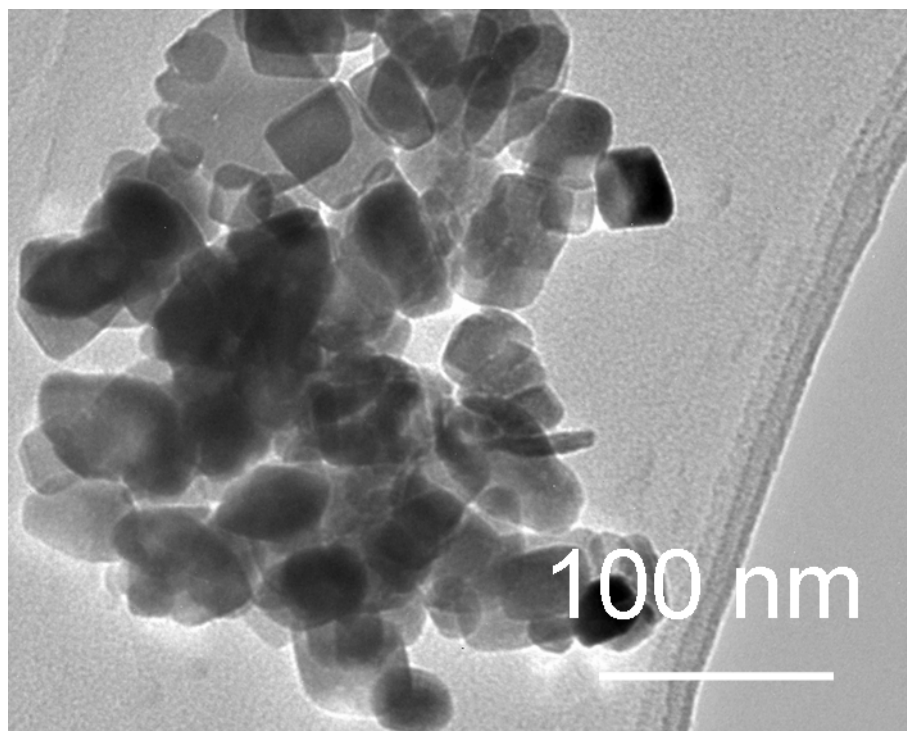

**Fig. S2** TEM image of the as-synthesized SnO<sub>2</sub> nanocrystals without using acetic acid.

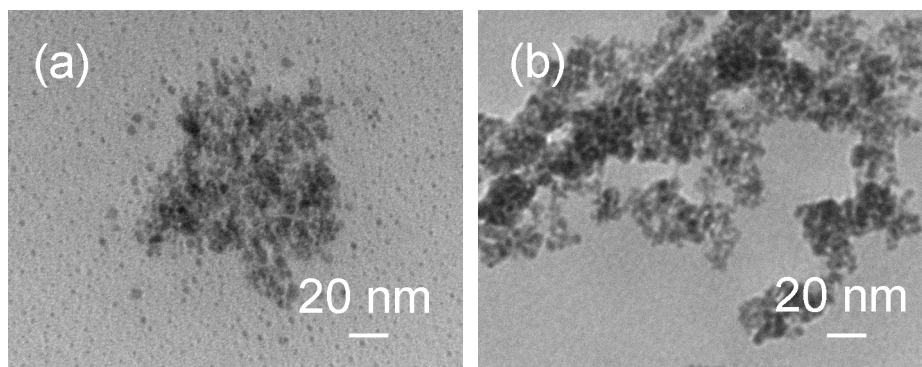

**Fig. S3** TEM images of the SnO<sub>2</sub> nanocrystals in the presence of different amount of acetic acid: (a) 0.6 mL and (b) 6 mL.

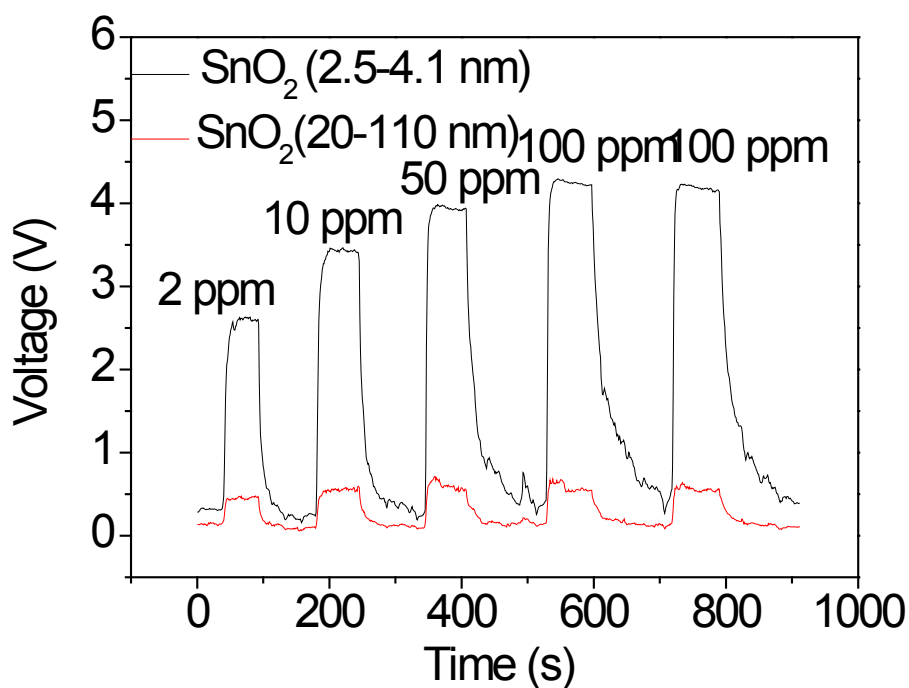

**Fig. S4** Dynamic response-recovery curves of the sensors of SnO<sub>2</sub> with different sizes to different ethanol concentrations at 220 °C.

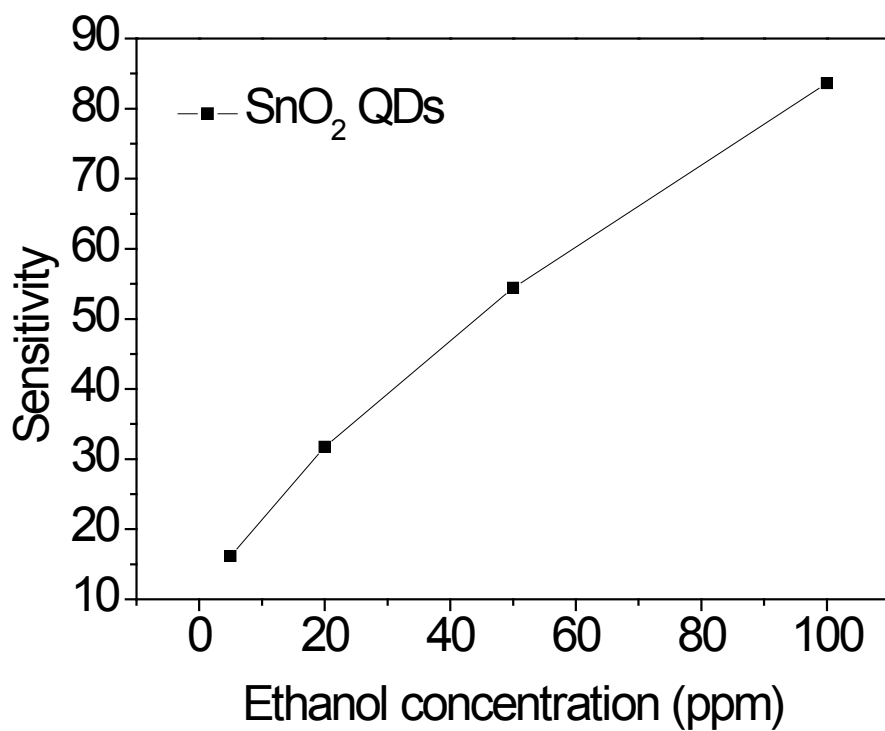

**Fig. S5** Sensor response to different ethanol concentrations at 220 °C.

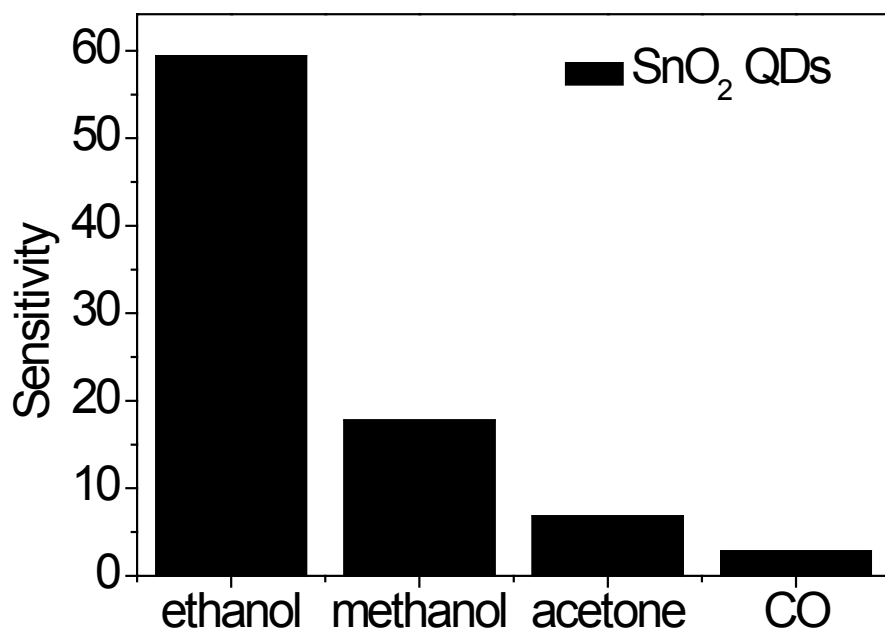

**Fig. S6** Sensor response to different gases at 220 °C.

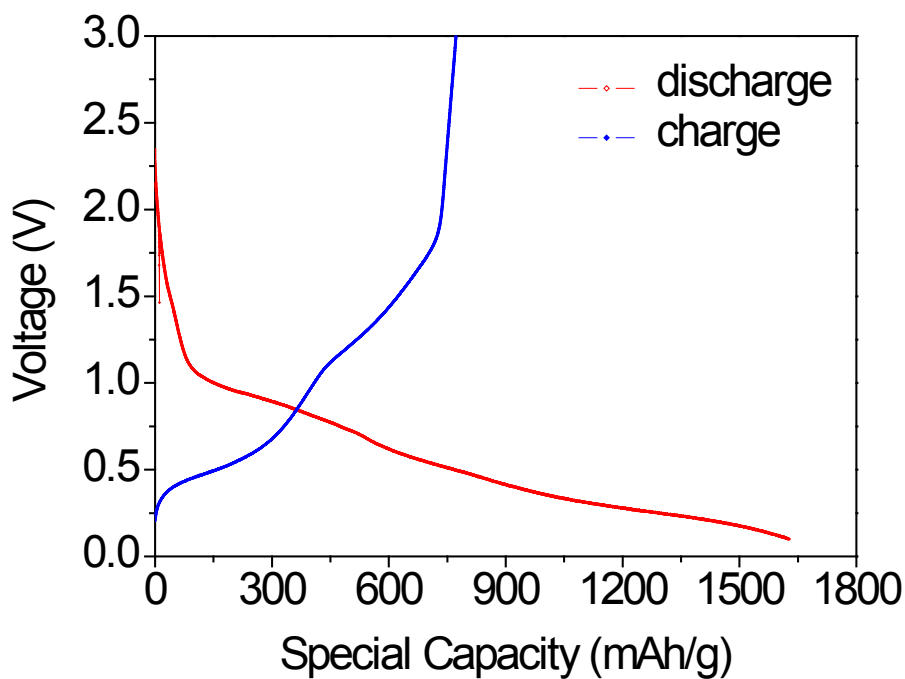

**Fig. S7** The initial charge and discharge curve of the as-synthesized SnO<sub>2</sub> nanocrystals electrode.

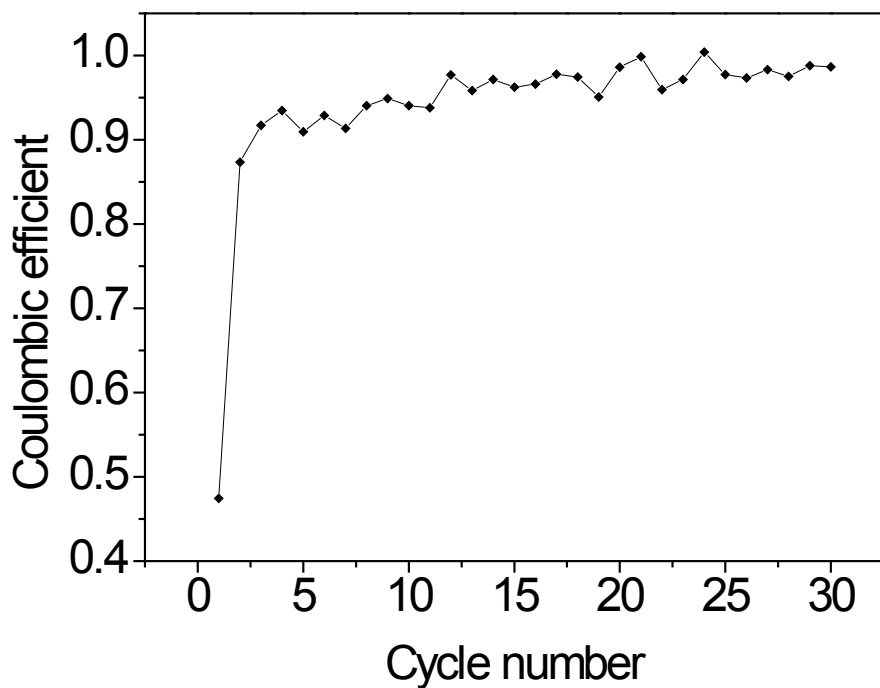

**Fig. S8** Coulombic efficiency vs. cycle number for the as-synthesized SnO<sub>2</sub> nanocrystals electrode.

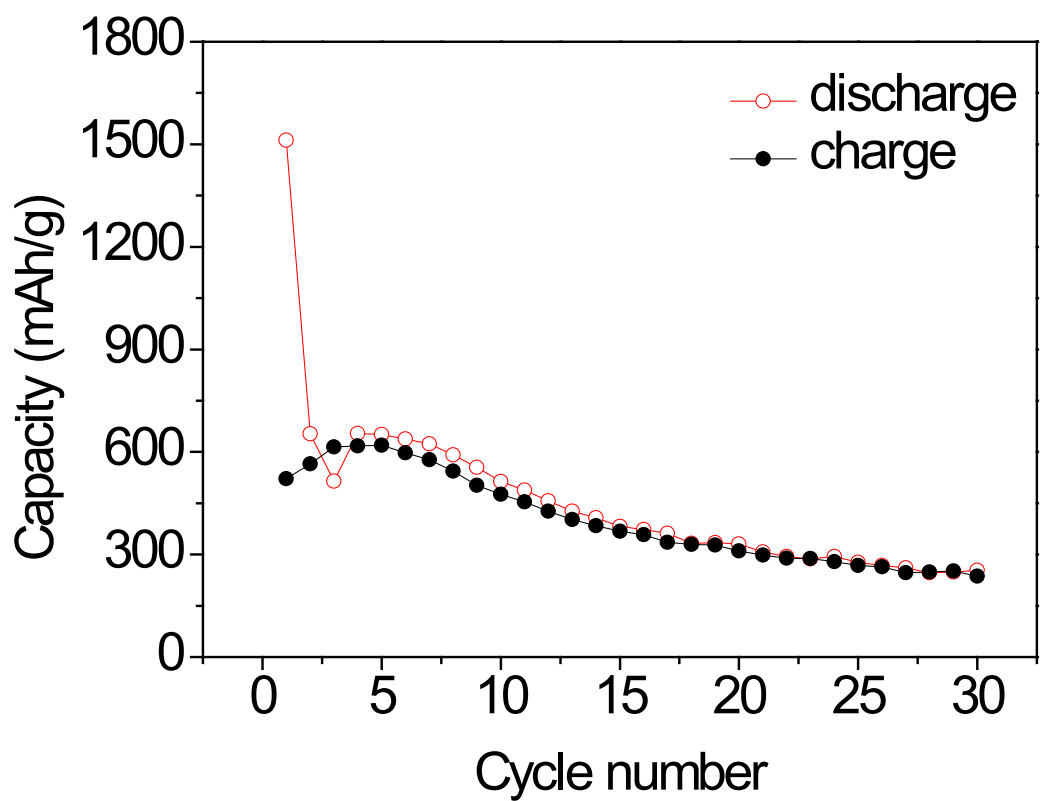

**Fig. S9** Variation of Li intercalation-deintercalation capacity vs. cycle number for the SnO<sub>2</sub> nanoparticles with size of 20-110 nm.
